# Supplementary material for: Reno-protective effects of renin–angiotensin system blockade in type 2 diabetic patients: a systematic review and network meta-analysis
Source: PubMed Central journal article supplement — Diabetologia. 2011 Dec 22;55(3):566–78. doi: 10.1007/s00125-011-2398-8 (PMC3268972; doi:10.1007/s00125-011-2398-8), 2011-12-22

**ESM Figure 7. Network meta-analysis of treatment effects between ACEI/ARB, other active drugs, and placebo**

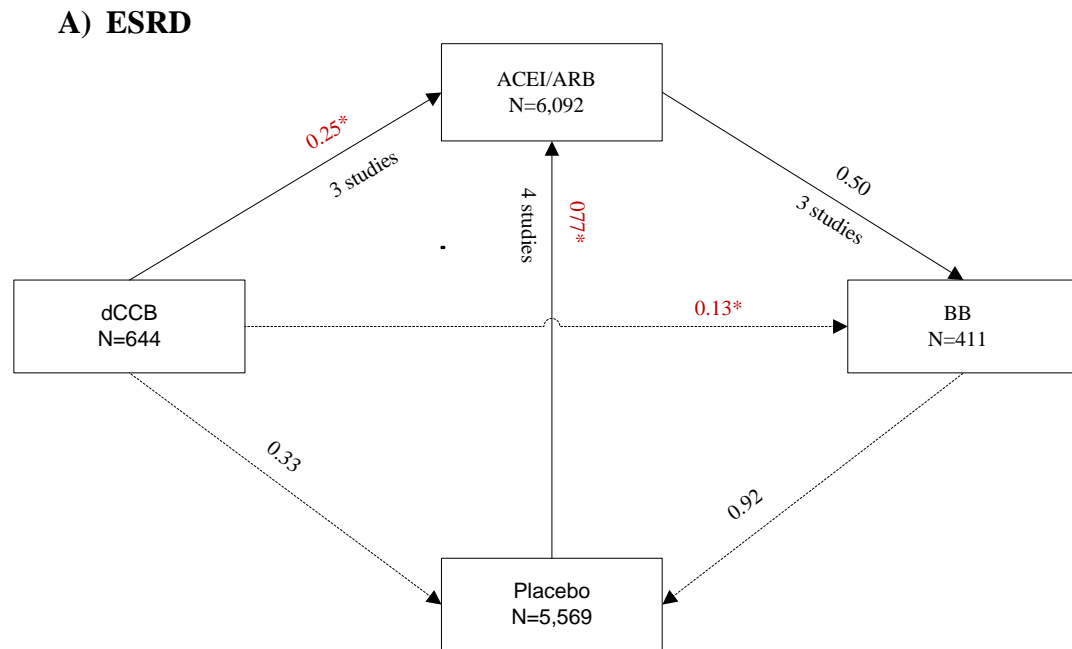

**B) Doubling of serum creatinine**

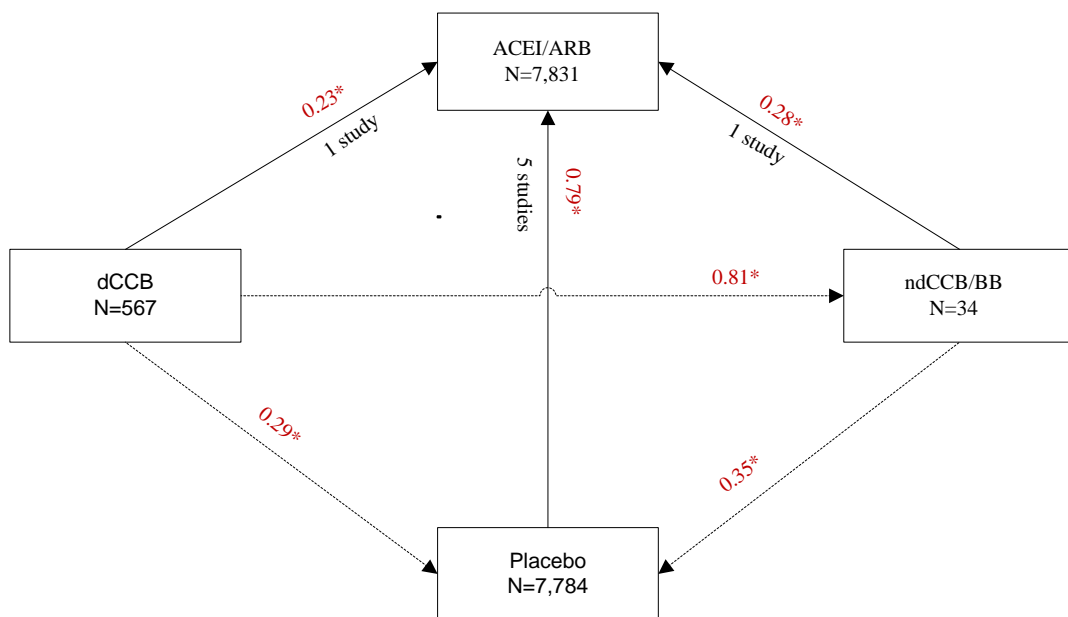

**C) Micro-vascular complications**

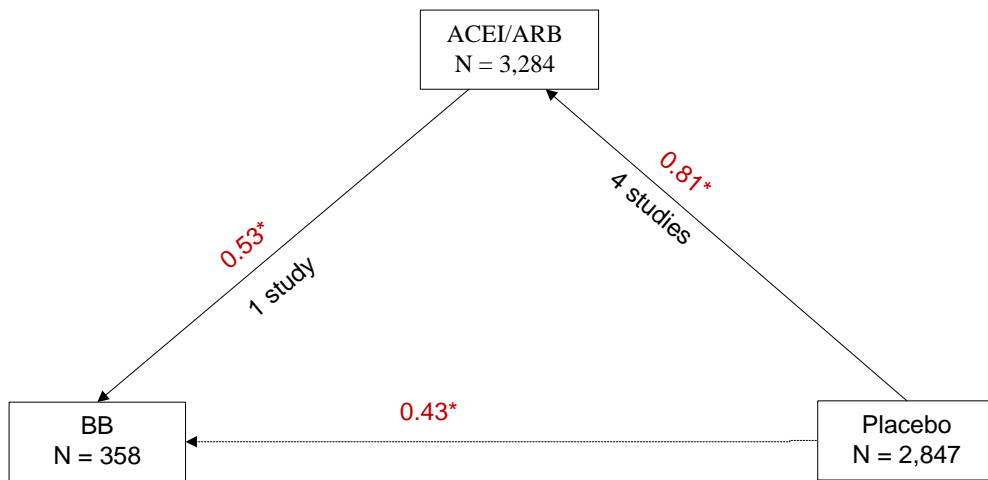

**D) Macro-albuminuria**

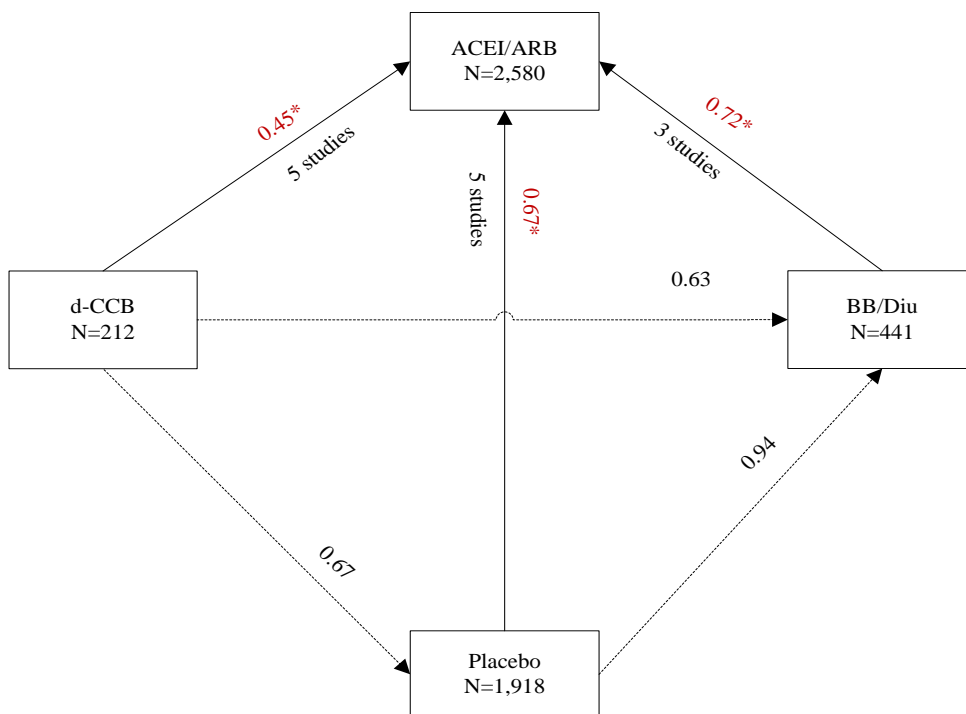

E) Micro-albuminuria

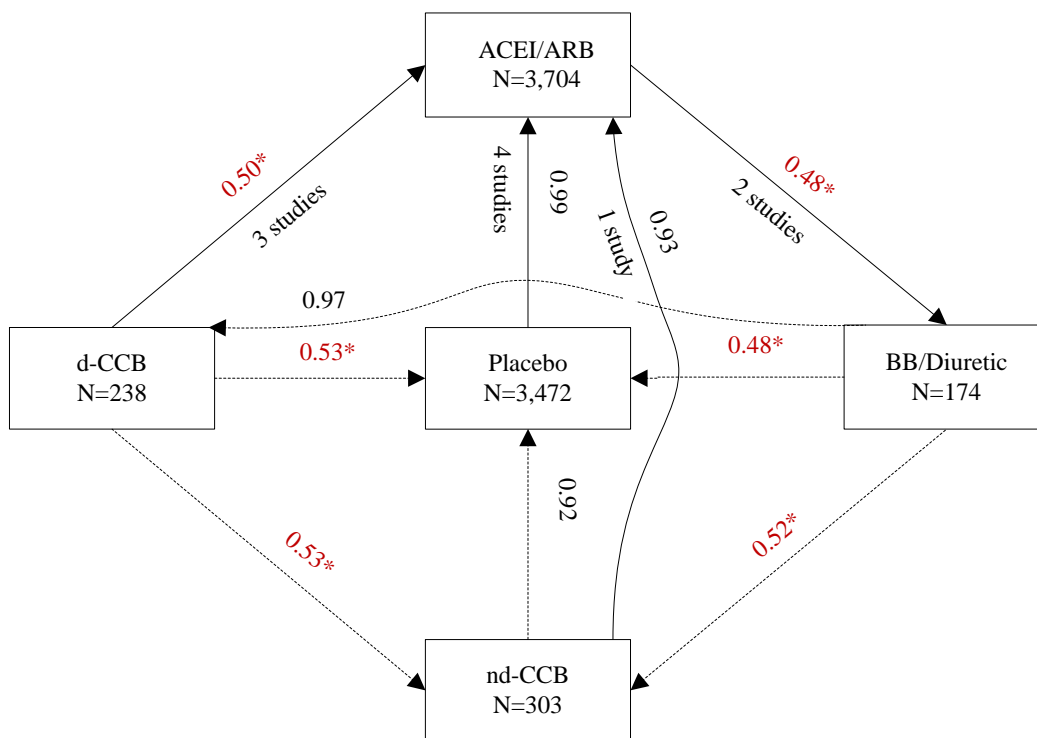

F) Regression of albuminuria

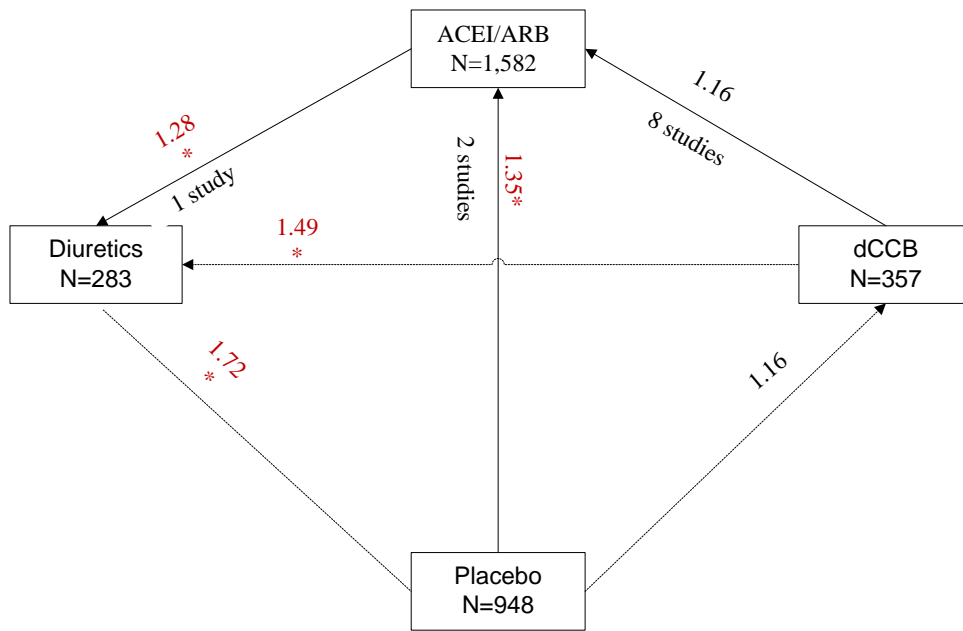

Supplement: 125_2011_2398_MOESM7_ESM.pdf [file 125_2011_2398_MOESM7_ESM.pdf]
