# Supplementary material for: Reno-protective effects of renin–angiotensin system blockade in type 2 diabetic patients: a systematic review and network meta-analysis
Source: PubMed Central journal article supplement — Diabetologia. 2011 Dec 22;55(3):566–78. doi: 10.1007/s00125-011-2398-8 (PMC3268972; doi:10.1007/s00125-011-2398-8), 2011-12-22
Supplement: 125_2011_2398_MOESM8_ESM.pdf [file 125_2011_2398_MOESM8_ESM.pdf]

**ESM Table 1. ESRD between ACEI/ARB and active drugs or placebo**

| Study <sup>(Reference)</sup>    | Mean Age | Mean Crcl <sup>a</sup> | Albuminuria                                   | Treatments    | SBP (SD)    | DBP (SD)    | No. of Events | N     | RR (95%CI)         |
|---------------------------------|----------|------------------------|-----------------------------------------------|---------------|-------------|-------------|---------------|-------|--------------------|
| <b>ACEI/ARB vs Active drugs</b> |          |                        |                                               |               |             |             |               |       |                    |
| UKPDS group[26]                 | 56       | -                      | Mixed                                         | Captopril     | 144 (14)    | 83 (8)      | 4             | 400   | 0.90 (0.23, 3.55)  |
|                                 |          |                        |                                               | Atenolol      | 143 (14)    | 81 (7)      | 4             | 358   |                    |
| Bakris et al[20]                | 62       | 62.9                   | Macroalb <sup>b</sup>                         | Lisinopril    | -           | -           | 0             | 18    | 0.21 (0.01, 3.60)  |
|                                 |          |                        |                                               | Atenolol      | -           | -           | 4             | 16    |                    |
|                                 |          |                        |                                               | nd-CCB        | -           | -           | 0             | 18    |                    |
| Chan et al[21]                  | 58       | 75.3                   | Mixed                                         | Enalapril     | 137 (11.8)  | 72.1 (14.6) | 6             | 50    | 1.25 (0.41, 3.83)  |
|                                 |          |                        |                                               | Nifedipine SR | 132.2 (9.4) | 72.6 (7.8)  | 5             | 52    |                    |
| Fogari et al[40]                | 56       | 43.8                   | Macroalb                                      | Ramipril      | 147.8 (10)  | 89.9 (6)    | 1             | 26    | 0.96 (0.06, 14.55) |
|                                 |          |                        |                                               | Nitrendipine  | 149.4 (12)  | 91 (7)      | 1             | 25    |                    |
| Nielsen et al[30]               | 61       | 74.5 <sup>c</sup>      | Macroalb                                      | Lisinopril    | 145 (16.5)  | 76 (8.3)    | 1             | 17    | 1.12 (0.08, 16.52) |
|                                 |          |                        |                                               | Atenolol      | 148 (8.7)   | 82 (8.7)    | 1             | 19    |                    |
| Lewis et al[33]                 | 59       | -                      | Proteinuria                                   | Irbesartan    | 140(-)      | 77(-)       | 87            | 579   | 0.80 (0.62, 1.04)  |
|                                 |          |                        |                                               | Amlodipine    | 141(-)      | 77(-)       | 105           | 569   |                    |
| Pooled RR                       |          |                        |                                               |               |             |             |               |       | 0.82 (0.64, 1.05)  |
| <b>ACEI/ARB vs Placebo</b>      |          |                        |                                               |               |             |             |               |       |                    |
| HOPE Study Investigators[24]    | 65       | -                      | Normoalb <sup>d</sup> & Microalb <sup>e</sup> | Ramipril      | -           | -           | 10            | 1,808 | 1.22 (0.48, 3.09)  |
|                                 |          |                        |                                               | Placebo       | -           | -           | 8             | 1,769 |                    |
| Marre et al[29]                 | 65       | -                      | Microalb & Macroalb                           | Ramipril      | -           | -           | 11            | 2,443 | 0.93 (0.41, 2.10)  |
|                                 |          |                        |                                               | Placebo       | -           | -           | 12            | 2,469 |                    |
| Brenner et al[34]               | 60       | -                      | Macroalb                                      | Losartan      | 140(-)      | 74(-)       | 147           | 751   | 0.77 (0.64, 0.93)  |
|                                 |          |                        |                                               | Placebo       | 142(-)      | 74(-)       | 194           | 762   |                    |
| Lewis et al[33]                 | 59       | -                      | Proteinuria                                   | Irbesartan    | 140(-)      | 77(-)       | 87            | 579   | 0.81 (0.63, 1.06)  |
|                                 |          |                        |                                               | Placebo       | 144(-)      | 80(-)       | 106           | 567   |                    |
| Pooled RR                       |          |                        |                                               |               |             |             |               |       | 0.80 (0.69, 0.93)  |

<sup>a</sup> Creatinine clearance (ml/min), <sup>b</sup> Macro-albuminuria, <sup>c</sup> Estimated GRF (ml/min.1.73 m<sup>-2</sup>), <sup>d</sup> Normo-albuminuria, <sup>e</sup> Micro-albuminuria
