# Supplementary material for: Reno-protective effects of renin–angiotensin system blockade in type 2 diabetic patients: a systematic review and network meta-analysis
Source: PubMed Central journal article supplement — Diabetologia. 2011 Dec 22;55(3):566–78. doi: 10.1007/s00125-011-2398-8 (PMC3268972; doi:10.1007/s00125-011-2398-8), 2011-12-22
Supplement: 125_2011_2398_MOESM9_ESM.pdf [file 125_2011_2398_MOESM9_ESM.pdf]

**ESM Table 2. Doubling of serum creatinine between ACEI/ARB and active drugs or placebo**

|                                 | Mean Age | Mean Crcl <sup>a</sup> | Albuminuria                                    | Treatments      | SBP (sd) | DBP (sd) | No. of Events | N     | RR (95%CI)        |
|---------------------------------|----------|------------------------|------------------------------------------------|-----------------|----------|----------|---------------|-------|-------------------|
| <b>ACEI/ARB vs Active drugs</b> |          |                        |                                                |                 |          |          |               |       |                   |
| Bakris et al[20]                | 62       | 62.9                   | Macroalb <sup>b</sup>                          | Lisinopril      | -        | -        | 1             | 18    | 0.27 (0.34, 2.03) |
|                                 |          |                        |                                                | Atenolol/nd-CCB | -        | -        | 7             | 34    |                   |
| Lewis et al[33]                 | 59       | -                      | Proteinuria                                    | Irbesartan      | 140(-)   | 77(-)    | 98            | 579   | 0.67 (0.53, 0.84) |
|                                 |          |                        |                                                | Amlodipine      | 141(-)   | 77(-)    | 144           | 567   |                   |
| Pooled RR                       |          |                        |                                                |                 |          |          |               |       | 0.66 (0.53, 0.83) |
| <b>ACEI/ARB vs Placebo</b>      |          |                        |                                                |                 |          |          |               |       |                   |
| HOPE Study[24]                  | 65       | -                      | Norrmoalb <sup>c</sup> & Microalb <sup>d</sup> | Ramipril        | -        | -        | 118           | 1,808 | 0.78 (0.61, 0.98) |
|                                 |          |                        |                                                | Placebo         | -        | -        | 149           | 1,769 |                   |
| Marre et al[29]                 |          |                        | Micro& macroalb                                | Ramipril        | -        | -        | 48            | 2,443 | 0.81 (0.56, 1.18) |
|                                 |          |                        |                                                | Placebo         | -        | -        | 60            | 2,469 |                   |
| Brenner B[34]                   | 60       | -                      | Macroalb                                       | Losartan        | 140(-)   | 74(-)    | 162           | 751   | 0.83 (0.69, 0.10) |
|                                 |          |                        |                                                | Placebo         | 142(-)   | 74(-)    | 198           | 762   |                   |
| Haller et al[39]                | 57.7     | 84.9                   | Normoalb                                       | Olmesartan      | 125.7(-) | 74.3(-)  | 23            | 2,232 | 0.99 (0.56, 1.76) |
|                                 |          |                        |                                                | Placebo         | 128.7(-) | 76.2(-)  | 23            | 2,215 |                   |
| Lewis et al[33]                 | 59       | -                      | Proteinuria                                    | Irbesartan      | 140(-)   | 77(-)    | 98            | 579   | 0.71 (0.57, 0.90) |
|                                 |          |                        |                                                | Placebo         | 144(-)   | 80(-)    | 135           | 478   |                   |
| Pooled RR                       |          |                        |                                                |                 |          |          |               |       | 0.79 (0.71, 0.89) |

<sup>a</sup> Creatinine clearance (ml/min), <sup>b</sup> Macro-albuminuria, <sup>c</sup> Normo-albuminuria, <sup>d</sup> Micro-albuminuria
