# Supplementary material for: Reno-protective effects of renin–angiotensin system blockade in type 2 diabetic patients: a systematic review and network meta-analysis
Source: PubMed Central journal article supplement — Diabetologia. 2011 Dec 22;55(3):566–78. doi: 10.1007/s00125-011-2398-8 (PMC3268972; doi:10.1007/s00125-011-2398-8), 2011-12-22
Supplement: 125_2011_2398_MOESM10_ESM.pdf [file 125_2011_2398_MOESM10_ESM.pdf]

**ESM Table 3. Major micro-vascular complications between ACEI/ARB and active drugs or placebo**

| Study                           | Mean Age | Mean Crcl <sup>a</sup> | Albuminuria           | Treatments  | SBP (SD) | DBP (SD) | No. of Events | N     | RR (95%CI)        |
|---------------------------------|----------|------------------------|-----------------------|-------------|----------|----------|---------------|-------|-------------------|
| <b>ACEI/ARB vs Active drugs</b> |          |                        |                       |             |          |          |               |       |                   |
| UKPDS groups[26]                | 56       | -                      | Microalb <sup>b</sup> | Captopril   | 144 (14) | 83 (8)   | 40            | 400   | 1.28 (0.81, 2.03) |
|                                 |          |                        |                       | Atenolol    | 143 (14) | 81 (7)   | 28            | 358   |                   |
| <b>ACEI/ARB vs Placebo</b>      |          |                        |                       |             |          |          |               |       |                   |
| HOPE Study [24]                 | 65       | -                      | Normoalb & Microalb   | Ramipril    | -        | -        | 273           | 1,808 | 0.86 (0.74, 0.99) |
| Ravid et al[32]                 | 44       | -                      | Normoalb              | Placebo     |          |          | 312           | 1,769 | 0.64 (0.30, 1.34) |
|                                 |          |                        |                       | Enalapril   |          |          | 9             | 49    |                   |
| Ravid et al[31]                 | 55       | 108                    | Microalb              | Enalapril   | -        | -        | 6             | 77    | 0.41 (0.17, 1.00) |
|                                 |          |                        |                       | Placebo     | -        | -        | 15            | 79    |                   |
| Sjolie et al[37]                | 57       | -                      | Normoalb              | Candesartan |          |          | 161           | 950   | 0.89 (0.73, 1.08) |
|                                 |          |                        |                       | Placebo     |          |          | 182           | 954   |                   |
| Pooled RR                       |          |                        |                       |             |          |          |               |       | 0.85 (0.74, 0.97) |
