# Supplementary material for: Reno-protective effects of renin–angiotensin system blockade in type 2 diabetic patients: a systematic review and network meta-analysis
Source: PubMed Central journal article supplement — Diabetologia. 2011 Dec 22;55(3):566–78. doi: 10.1007/s00125-011-2398-8 (PMC3268972; doi:10.1007/s00125-011-2398-8), 2011-12-22
Supplement: 125_2011_2398_MOESM11_ESM.pdf [file 125_2011_2398_MOESM11_ESM.pdf]

**ESM Table 4. Macro-albuminuria between ACEI/ARB and active drugs or placebo**

| Study                           | Mean Age | Mean Crcl <sup>a</sup> | Albuminuria                      | Treatments          | SBP (SD)    | DBP (SD)    | No. of Events | N     | RR (95%CI)         |
|---------------------------------|----------|------------------------|----------------------------------|---------------------|-------------|-------------|---------------|-------|--------------------|
| <b>ACEI/ARB vs Active drugs</b> |          |                        |                                  |                     |             |             |               |       |                    |
| UKPDS groups[26]                | -        | -                      | Microalb <sup>b</sup>            | Captopril           | -           | -           | 7             | 153   | 0.48 (0.20, 1.15)  |
|                                 |          |                        |                                  | Atenolol            | -           | -           | 14            | 146   |                    |
| Baba et al[25]                  | 60       | 110.4                  | Microalb                         | Enalapril           | -           | -           | 3             | 53    | 0.91 (0.21, 3.87)  |
|                                 |          |                        |                                  | Nifedipine SR       | -           | -           | 4             | 64    |                    |
| Chan et al[21]                  | -        | -                      | Normoalb <sup>c</sup> & Microalb | Enalapril           | 137 (11.8)  | 72.1 (14.6) | 4             | 39    | 0.65 (0.20, 2.12)  |
|                                 |          |                        |                                  | Nifedipine SR       | 132.2 (9.4) | 72.6 (7.8)  | 6             | 38    |                    |
| Lacourciere et al[22]           | -        | -                      | Microalb                         | Captopril           | -           | -           | 0             | 9     | 0.26 (0.01, 4.83)  |
|                                 |          |                        |                                  | Metoprolol/<br>HCTZ | -           | -           | 2             | 12    |                    |
| Marre et al[38]                 | 60       | 92.5                   | Microalb                         | Enalapril           | 139.3(14.3) | 81.4 (7.9)  | 18            | 286   | 0.69 (0.38, 1.22)  |
|                                 |          |                        |                                  | Indapamide          | 137.3 (12)  | 81 (8.1)    | 26            | 283   |                    |
| Shiba et al[23]                 | 61       | -                      | Normoalb & Microalb              | Delapril            | -           | -           | 0             | 23    | 0.08 (0.01, 1.37)  |
|                                 |          |                        |                                  | Manidipine          | -           | -           | 4             | 16    |                    |
| Jerums et al [36]               | 53       |                        | Microalb                         | Perindopril         | -           | -           | 2             | 11    | 2.00 (0.21, 18.98) |
|                                 |          |                        |                                  | Nifedipine          | -           | -           | 1             | 11    |                    |
| Estacio et al[19]               | 58       | -                      | Microalb                         | Enalapril           | -           | -           | 13            | 67    | 0.95 (0.50, 1.81)  |
|                                 |          |                        |                                  | Nisoldipine         | -           | -           | 17            | 83    |                    |
| Pooled RR                       |          |                        |                                  |                     |             |             |               |       | 0.71 (0.50, 1.00)  |
| <b>ACEI/ARB vs Placebo</b>      |          |                        |                                  |                     |             |             |               |       |                    |
| HOPE Study [24]                 | 65       | -                      | Normoalb & Microalb              | Ramipril            | -           | -           | 117           | 1,808 | 0.77 (0.61, 0.97)  |
|                                 |          |                        |                                  | Placebo             | -           | -           | 149           | 1,769 |                    |
| Ahmad et al[41]                 | 50       | 124 <sup>c</sup>       | Microalb                         | Enalapril           | 134 (5.7)   | 80 (4.6)    | 4             | 52    | 0.33 (0.11, 0.95)  |
|                                 |          |                        |                                  | Placebo             | 134 (5.7)   | 83 (5.1)    | 12            | 51    |                    |
| Lebovitz et al[42]              | -        | -                      | Normoalb & Microalb              | Enalapril           | -           | -           | 2             | 30    | 0.32 (0.07, 1.38)  |
|                                 |          |                        |                                  | Placebo             | -           | -           | 8             | 38    |                    |
| Ravid et al[32]                 | 44       | -                      | Microalb                         | Enalapril           | -           | -           | 6             | 49    | 0.29 (0.13, 0.66)  |
|                                 |          |                        |                                  | Placebo             | -           | -           | 19            | 45    |                    |
| Jerums et al[36]                | 53       |                        | Microalb                         | Perindopril         | -           | -           | 2             | 11    | 0.39 (0.10, 1.53)  |
|                                 |          |                        |                                  | Placebo             | -           | -           | 7             | 15    |                    |
| Pooled RR                       |          |                        |                                  |                     |             |             |               |       | 0.67 (0.54, 0.83)  |

<sup>a</sup> Creatinine clearance (ml/min), <sup>b</sup> Micro-albuminuria, <sup>c</sup> Normo-albuminuria, <sup>d</sup> not include in the direct meta-analysis, <sup>e</sup> Glomerular filtration rate (ml/min/1.73 m<sup>2</sup>)
