# Supplementary material for: Reno-protective effects of renin–angiotensin system blockade in type 2 diabetic patients: a systematic review and network meta-analysis
Source: PubMed Central journal article supplement — Diabetologia. 2011 Dec 22;55(3):566–78. doi: 10.1007/s00125-011-2398-8 (PMC3268972; doi:10.1007/s00125-011-2398-8), 2011-12-22
Supplement: 125_2011_2398_MOESM12_ESM.pdf [file 125_2011_2398_MOESM12_ESM.pdf]

**ESM Table 5. Micro-albuminuria between ACEI/ARB and active drugs or placebo**

| Study <sup>(Reference)</sup>    | Mean Age | Mean Crcl <sup>a</sup> | Albuminuria            | Treatments        | SBP (SD) | DBP (SD) | No. of Events | N     | RR (95%CI)         |
|---------------------------------|----------|------------------------|------------------------|-------------------|----------|----------|---------------|-------|--------------------|
| <b>ACEI/ARB vs Active drugs</b> |          |                        |                        |                   |          |          |               |       |                    |
| UKPDS groups[26]                | 56       | -                      | Norrmoalb <sup>b</sup> | Captopril         | -        | -        | 48            | 153   | 1.21 (0.84, 1.73)  |
|                                 |          |                        |                        | Atenolol          | -        | -        | 38            | 146   |                    |
| Baba et al[25]                  | 60       | 110.4                  | Norrmoalb              | Enalapril         | -        | -        | 15            | 95    | 0.73 (0.40, 1.31)  |
|                                 |          |                        |                        | Nifedipine SR     | -        | -        | 23            | 106   |                    |
| Chan et al[21]                  | 58       | 75.3                   | Norrmoalb              | Enalapril         | -        | -        | 4             | 18    | 1.11 (0.35, 3.57)  |
|                                 |          |                        |                        | Nifedipine SR     | -        | -        | 5             | 25    |                    |
| Lacourciere et al[22]           | 57       | -                      | Norrmoalb              | Captopril         | -        | -        | 1             | 25    | 0.56 (0.05, 5.81)  |
|                                 |          |                        |                        | Metoprolol / HCTZ | -        | -        | 2             | 28    |                    |
| Ruggenenti et al[43]            | 62       | -                      | Norrmoalb              | Trandolapril      | 139 (12) | 81(6)    | 18            | 301   | 0.50 (0.29, (0.87) |
|                                 |          |                        |                        | Verapamil         | 142 (12) | 83 (6)   | 36            | 303   |                    |
| Estacio et al[19]               | 58       | 85                     | Norrmoalb              | Enalapril         | -        | -        | 25            | 123   | 0.87 (0.53, 1.42)  |
|                                 |          |                        |                        | Nisoldipine       | -        | -        | 25            | 107   |                    |
| Pooled RR                       |          |                        |                        |                   |          |          |               |       | 0.84 (0.61, 1.15)  |
| <b>ACEI/ARB vs Placebo</b>      |          |                        |                        |                   |          |          |               |       |                    |
| Ravid et al[31]                 | 55       | 107.7                  | Norrmoalb              | Enalapril         | -        | -        | 5             | 7,785 | 0.34 (0.13, 0.90)  |
|                                 |          |                        |                        | Placebo           | -        | -        | 15            | 79    |                    |
| Ruggenenti et al[43]            | 62       | -                      | Norrmoalb              | Trandolapril      | 139 (12) | 81 (6)   | 18            | 301   | 0.60 (0.34, 1.05)  |
|                                 |          |                        |                        | Placebo           | 141 (10) | 82 (6)   | 30            | 300   |                    |
| Haller et al[39]                | 57.7     | 84.9                   | Normoalb               | Olmesartan        | 125.7(-) | 74.3(-)  | 178           | 1,961 | 0.93 (0.77, 1.12)  |
|                                 |          |                        |                        | Placebo           | 128.7(-) | 76.2(-)  | 210           | 2,139 |                    |
| Bilous et al[35]                | 56.9     | -                      | Normoalb               | Candesartan       | -        | -        | 114           | 951   | 0.92 (0.73, 1.17)  |
|                                 |          |                        |                        | Placebo           | -        | -        | 124           | 954   |                    |
| Pooled RR                       |          |                        |                        |                   |          |          |               |       | 0.82 (0.64, 1.05)  |

<sup>a</sup> Creatinine clearance (ml/min), <sup>b</sup> Normo-albuminuria
