# Supplementary material for: Reno-protective effects of renin–angiotensin system blockade in type 2 diabetic patients: a systematic review and network meta-analysis
Source: PubMed Central journal article supplement — Diabetologia. 2011 Dec 22;55(3):566–78. doi: 10.1007/s00125-011-2398-8 (PMC3268972; doi:10.1007/s00125-011-2398-8), 2011-12-22
Supplement: 125_2011_2398_MOESM13_ESM.pdf [file 125_2011_2398_MOESM13_ESM.pdf]

**ESM Table 6. Albuminuria Regression between ACEI/ARB and active drugs or placebo**

| Study(Reference)                | Mean Age | Mean Crcl <sup>a</sup> | Albuminuria                      | Treatments                           | SBP (SD)     | DBP (SD)    | No. of Event | N   | RR (95%CI)        |
|---------------------------------|----------|------------------------|----------------------------------|--------------------------------------|--------------|-------------|--------------|-----|-------------------|
| <b>ACEI/ARB vs Active drugs</b> |          |                        |                                  |                                      |              |             |              |     |                   |
| Baba et al[25]                  | 60       | 110.4                  | Microalb                         | Enalapril                            | -            | -           | 11           | 53  | 0.70 (0.37, 1.34) |
|                                 |          |                        |                                  | Nifedipine SR                        | -            | -           | 19           | 64  |                   |
| Chan et al[21]                  | -        | -                      | Microalb & Macroalb <sup>d</sup> | Enalapril                            | 137 (11.8)   | 72.1 (14.6) | 6            | 32  | 1.01 (0.35, 2.95) |
|                                 |          |                        |                                  | Nifedipine SR                        | 132.2 (9.4)  | 72.6 (7.8)  | 5            | 27  |                   |
| Fogari et al[27]                | 60       | 93.4                   | Microalb                         | Lisinopril                           | 126.8 (9.9)  | 74.4(4.1)   | 27           | 49  | 1.45 (0.94, 2.24) |
|                                 |          |                        |                                  | Manidipine                           | 125.3 (9.3)  | 73.8(3.9)   | 19           | 50  |                   |
| Fogari et al[28]                | 63       | -                      | Microalb                         | Fosinopril                           | 142.3 (10.4) | 87.3 (5.6)  | 47           | 102 | 1.40 (0.99,1.97)  |
|                                 |          |                        |                                  | Amlodipine                           | 140.4 (10.1) | 86.5 (5.4)  | 34           | 103 |                   |
|                                 |          |                        |                                  | Fosinopril + Amlodipine <sup>c</sup> | 132.4 (9.9)  | 82.3 (5.1)  | 70           | 104 |                   |
| Marre et al[38]                 | 60       | 92.5                   | Microalb                         | Enalapril                            | 139.3 (14.3) | 81.4(7.9)   | 120          | 286 | 1.06 (0.87, 1.29) |
|                                 |          |                        |                                  | Indapamide                           | 137.3 (12)   | 81(8.1)     | 112          | 283 |                   |
| Mosconi et al[44]               | -        | 64.6 <sup>e</sup>      | Microalb                         | Enalapril                            | 146.6 (12.4) | 93.7 (7.8)  | 4            | 6   | 1.17 (0.50, 2.74) |
|                                 |          |                        |                                  | Nitrendipine                         | 150.3 (11.7) | 84.9 (3.6)  | 4            | 7   |                   |
| Ogawa et al[45]                 | 62       | -                      | UACR 100 - 300 mg/g Cr           | Temocapril                           | 130 (4.5)    | 78.5(3.3)   | 5            | 34  | 1.32 (2.9, 6.16)  |
|                                 |          |                        |                                  | Nifedipine                           |              |             | 2            | 18  |                   |
| Jerums et al[36]                | 53       | 90                     | Microalb                         | Perindopril                          | -            | -           | 1            | 11  | 0.33 (0.04, 2.73) |
|                                 |          |                        |                                  | Nifedipine                           | -            | -           | 3            | 11  |                   |
| Kashiwagi et al[18]             | 62       |                        | Microalb                         | Valsartan                            | -            | -           | 17           | 73  | 1.99 (0.95, 4.18) |
|                                 |          |                        |                                  | Amlodipine                           | -            | -           | 9            | 77  |                   |
| Pooled RR                       |          |                        |                                  |                                      |              |             |              |     | 1.16 (1.00, 1.34) |

| <b>ACEI/ARB vs Placebo</b> |    |    |                     |             |   |   |     |     |                   |
|----------------------------|----|----|---------------------|-------------|---|---|-----|-----|-------------------|
| Marre et al[29]            | 65 | -  | Microalb & Macroalb | Ramipril    | - | - | 253 | 936 | 1.17 (1.00, 1.37) |
|                            |    |    |                     | Placebo     | - | - | 215 | 933 |                   |
| Jerums et al[36]           | 53 | 90 | Microalb            | Perindopril | - | - | 1   | 11  | 0.46 (0.05, 3.81) |
|                            |    |    |                     | Nifedipine  | - | - | 3   | 15  |                   |
| Pooled RR                  |    |    |                     |             |   |   |     |     | 1.17 (1.00, 1.37) |

<sup>a</sup> Creatinine clearance (ml/min), <sup>b</sup> Micro-albuminuria, <sup>c</sup> not include in the direct meta-analysis, <sup>e</sup> Macro-albuminuria, <sup>e</sup> Glomerular filtration rate (ml/min/1.73 m<sup>2</sup>),
