# Supplementary material for: Reno-protective effects of renin–angiotensin system blockade in type 2 diabetic patients: a systematic review and network meta-analysis
Source: PubMed Central journal article supplement — Diabetologia. 2011 Dec 22;55(3):566–78. doi: 10.1007/s00125-011-2398-8 (PMC3268972; doi:10.1007/s00125-011-2398-8), 2011-12-22
Supplement: 125_2011_2398_MOESM14_ESM.pdf [file 125_2011_2398_MOESM14_ESM.pdf]

**ESM Table 7. Risk of bias assessment**

| Study                | Sequence generation | Allocation concealment | Blinding | Incomplete outcome | Selective outcome report | Free of other bias | Description of other bias     |
|----------------------|---------------------|------------------------|----------|--------------------|--------------------------|--------------------|-------------------------------|
| UKPDS[26]            | Y                   | Y                      | Y        | Y                  | Y                        | Y                  |                               |
| HOPE Study[24]       | U                   | U                      | Y        | Y                  | N                        | Y                  |                               |
| Ahmad et al[41]      | U                   | U                      | Y        | Y                  | Y                        | Y                  |                               |
| Baba et al[25]       | Y                   | U                      | N        | Y                  | N                        | Y                  |                               |
| Bakris et al[20]     | U                   | U                      | Y        | Y                  | Y                        | N                  | Imbalanced baseline BP        |
| Chan et al[21]       | Y                   | Y                      | Y        | Y                  | N                        | N                  | Imbalanced baseline SBP       |
| Brenner et al[34]    | Y                   | Y                      | Y        | Y                  | Y                        | Y                  |                               |
| Fogari et al[27]     | Y                   | Y                      | Y        | Y                  | Y                        | Y                  |                               |
| Fogari et al[28]     | Y                   | Y                      | Y        | Y                  | Y                        | Y                  |                               |
| Fogari et al[40]     | U                   | U                      | U        | Y                  | Y                        | Y                  |                               |
| Lacouciere et al[22] | U                   | Y                      | Y        | Y                  | N                        | N                  | Imbalanced baseline BP        |
| Lebovitz et al[42]   | U                   | U                      | Y        | Y                  | Y                        | Y                  |                               |
| Marre et al[29]      | Y                   | Y                      | Y        | Y                  | Y                        | Y                  |                               |
| Marre et al[38]      | U                   | Y                      | Y        | Y                  | Y                        | Y                  |                               |
| Mosconi et al[44]    | U                   | U                      | Y        | Y                  | Y                        | Y                  |                               |
| Nielsen et al[30]    | Y                   | U                      | Y        | Y                  | Y                        | Y                  |                               |
| Ogawa et al[45]      | U                   | U                      | Y        | Y                  | Y                        | Y                  |                               |
| Ravid et al[31]      | Y                   | Y                      | Y        | Y                  | Y                        | Y                  |                               |
| Ravid et al[32]      | Y                   | N                      | Y        | Y                  | Y                        | Y                  |                               |
| Ruggenenti et al[43] | U                   | U                      | Y        | Y                  | Y                        | Y                  |                               |
| Shiba et al[23]      | U                   | U                      | U        | Y                  | Y                        | N                  | Imbalanced baseline BP, HbA1c |
| Jerums et al[36]     | Y                   | Y                      | Y        | Y                  | Y                        | Y                  |                               |
| Haller et al[39]     | U                   | Y                      | Y        | Y                  | Y                        | Y                  |                               |
| Lewis et al[33]      | Y                   | Y                      | Y        | Y                  | Y                        | Y                  |                               |
| Kashiwagi et al [18] | U                   | U                      | U        | N                  | N                        | N                  |                               |
| Bilous et al[35]     | Y                   | Y                      | Y        | Y                  | Y                        | Y                  |                               |
| Sjolie et al[37]     | Y                   | Y                      | Y        | Y                  | Y                        | Y                  |                               |
| Estacio et al[19]    | U                   | U                      | N        | N                  | Y                        | Y                  |                               |

Y=low risk, N=high risk, U=unclear
