# Supplementary material for: Reno-protective effects of renin–angiotensin system blockade in type 2 diabetic patients: a systematic review and network meta-analysis
Source: PubMed Central journal article supplement — Diabetologia. 2011 Dec 22;55(3):566–78. doi: 10.1007/s00125-011-2398-8 (PMC3268972; doi:10.1007/s00125-011-2398-8), 2011-12-22
Supplement: 125_2011_2398_MOESM15_ESM.pdf [file 125_2011_2398_MOESM15_ESM.pdf]

**ESM Table 8. Estimate effects of ACEI/ARB on renal and microvascular outcomes: A network meta-analysis**

| <b>a) ESRD</b>                               |           |               |
|----------------------------------------------|-----------|---------------|
| <b>Treatments</b>                            | <b>RR</b> | <b>95% CI</b> |
| ACEI/ARB vs d-CCB                            | 0.25      | 0.07, 0.96    |
| ACEI/ARB vs Placebo                          | 0.77      | 0.64, 0.92    |
| BB vs ACEI/ARB                               | 0.50      | 0.09, 2.88    |
| BB vs d-CCB                                  | 0.13      | 0.04, 0.41    |
| BB vs Placebo                                | 0.38      | 0.06, 2.57    |
| Placebo vs d-CCB                             | 0.33      | 0.08, 1.43    |
| <b>b) Doubling serum creatinine</b>          |           |               |
| <b>Treatments</b>                            | <b>RR</b> | <b>95% CI</b> |
| ACEI/ARB vs d-CCB                            | 0.23      | 0.09, 0.57    |
| ACEI/ARB vs nd-CCB/BB                        | 0.28      | 0.11, 0.71    |
| ACEI/ARB vs Placebo                          | 0.79      | 0.75, 0.84    |
| nd-CCB vs d-CCB                              | 0.81      | 0.81, 0.81    |
| Placebo vs d-CCB                             | 0.29      | 0.11, 0.74    |
| Placebo vs nd-CCB/BB                         | 0.35      | 0.14, 0.91    |
| <b>c) major micro-vascular complications</b> |           |               |
| <b>Treatments</b>                            | <b>RR</b> | <b>95% CI</b> |
| ACEI/ARB vs Placebo                          | 0.81      | 0.71, 0.92    |
| BB vs ACEI/ARB                               | 0.53      | 0.46, 0.60    |
| BB vs Placebo                                | 0.43      | 0.40, 0.45    |
| <b>d) macro-albuminuria</b>                  |           |               |
| <b>Treatments</b>                            | <b>RR</b> | <b>95% CI</b> |
| ACEI/ARB vs BB/Diuretic                      | 0.72      | 0.62, 0.83    |
| ACEI/ARB vs d-CCB                            | 0.45      | 0.29, 0.70    |
| ACEI/ARB vs Placebo                          | 0.67      | 0.49, 0.92    |
| BB/Diuretic vs d-CCB                         | 0.63      | 0.39, 1.02    |
| BB/Diuretic vs Placebo                       | 0.94      | 0.64, 1.37    |
| Placebo vs d-CCB                             | 0.67      | 0.37, 1.24    |

---

**e) Micro-albuminuria**

| <b>Treatments</b>       | <b>RR</b> | <b>95% CI</b> |
|-------------------------|-----------|---------------|
| ACEI/ARB vs BB/Diuretic | 0.48      | 0.35, 0.66    |
| ACEI/ARB vs d-CCB       | 0.50      | 0.38, 0.65    |
| ACEI/ARB vs nd-CCB      | 0.93      | 0.71, 1.22    |
| ACEI/ARB vs Placebo     | 1.00      | 0.82, 1.25    |
| d-CCB vs BB/Diuretic    | 0.97      | 0.70, 1.35    |
| nd-CCB vs BB/Diuretic   | 0.52      | 0.37, 0.72    |
| nd-CCB vs d-CCB         | 0.53      | 0.50, 0.56    |
| Placebo vs BB/Diuretic  | 0.48      | 0.33, 0.69    |
| Placebo vs d-CCB        | 0.49      | 0.41, 0.59    |
| Placebo vs nd-CCB       | 0.92      | 0.77, 1.09    |

---

**f) Albuminuria regression**

| <b>Treatments</b>    | <b>RR</b> | <b>95% CI</b> |
|----------------------|-----------|---------------|
| ACEI/ARB vs d-CCB    | 1.17      | 0.83, 1.63    |
| ACEI/ARB vs Placebo  | 1.35      | 1.07, 1.70    |
| d-CCB vs Placebo     | 1.16      | 0.83, 1.61    |
| Diuretic vs ACEI/ARB | 1.28      | 1.02, 1.60    |
| Diuretic vs d-CCB    | 1.49      | 1.07, 2.07    |
| Diuretic vs Placebo  | 1.72      | 1.71, 1.73    |

---
