# Supplementary material for: Reno-protective effects of renin–angiotensin system blockade in type 2 diabetic patients: a systematic review and network meta-analysis
Source: PubMed Central journal article supplement — Diabetologia. 2011 Dec 22;55(3):566–78. doi: 10.1007/s00125-011-2398-8 (PMC3268972; doi:10.1007/s00125-011-2398-8), 2011-12-22
Supplement: 125_2011_2398_MOESM16_ESM.pdf [file 125_2011_2398_MOESM16_ESM.pdf]

**ESM Table 9. Summary of clinical outcomes between ACEI/ARB, other active drugs and placebo**

| <b>Treatment</b>             | <b>Micro-albuminuria</b> | <b>Macro-albuminuria</b> | <b>Albuminuria regression</b> | <b>Doubling of serum creatinine</b> | <b>ESRD</b> |
|------------------------------|--------------------------|--------------------------|-------------------------------|-------------------------------------|-------------|
| <b>ACEI/ARB vs BB</b>        | -                        | -                        | -                             | -                                   | ×           |
| ACEI/ARB vs BB/Diuretic      | √                        | √                        | -                             | -                                   | -           |
| ACEI/ARB vs d-CCB            | √                        | √                        | ×                             | √                                   | √           |
| ACEI/ARB vs nd-CCB           | ×                        | -                        | -                             | -                                   | -           |
| ACEI/ARB vs nd-CCB/BB        | -                        | -                        | -                             | √                                   | -           |
| ACEI/ARB vs Diuretic         | -                        | -                        | -                             | -                                   | -           |
| ACEI/ARB vs placebo          | ×                        | √                        | √                             | -                                   | √           |
| ACEI/ARB vs all active drugs | √                        | √                        | ×                             | √                                   | √           |
| BB vs d-CCB                  | -                        | -                        | -                             | -                                   | √           |
| BB vs Placebo                | -                        | -                        | -                             | -                                   | ×           |
| BB/Diuretic vs d-CCB         | ×                        | ×                        | -                             | -                                   | -           |
| BB/Diuretic vs Placebo       |                          |                          |                               |                                     |             |
| nd-CCB vs BB/Diuretic        | √                        | -                        | -                             | -                                   | -           |
| nd-CCB vs d-CCB              | √                        | -                        | -                             | -                                   | -           |
| nd-CCB vs Placebo            | ×                        | -                        | -                             | -                                   | -           |
| nd-CCB/BB vs d-CCB           | -                        | -                        | -                             | √                                   | -           |
| d-CCB vs placebo             | ×                        | ×                        | ×                             | -                                   | ×           |
| Diuretic vs ACEI/ARB         | -                        | -                        | √                             | -                                   | -           |
| Diuretic vs d-CCB            | -                        | -                        | √                             | -                                   | -           |
| Diuretic vs Placebo          | -                        | -                        | √                             | -                                   | -           |
| Placebo vs BB/Diuretic       | √                        | -                        | -                             | -                                   | -           |
| Placebo vs d-CCB             | √                        | -                        | -                             | √                                   | -           |
| Placebo vs nd-CCB            | -                        | -                        | -                             | √                                   | -           |
