# Supplementary figures and images for: Reno-protective effects of renin–angiotensin system blockade in type 2 diabetic patients: a systematic review and network meta-analysis
Source: PubMed Central journal article supplement — Diabetologia. 2011 Dec 22;55(3):566–78. doi: 10.1007/s00125-011-2398-8 (PMC3268972; doi:10.1007/s00125-011-2398-8), 2011-12-22

ESM Figure 1. Funnel plots for ESRD

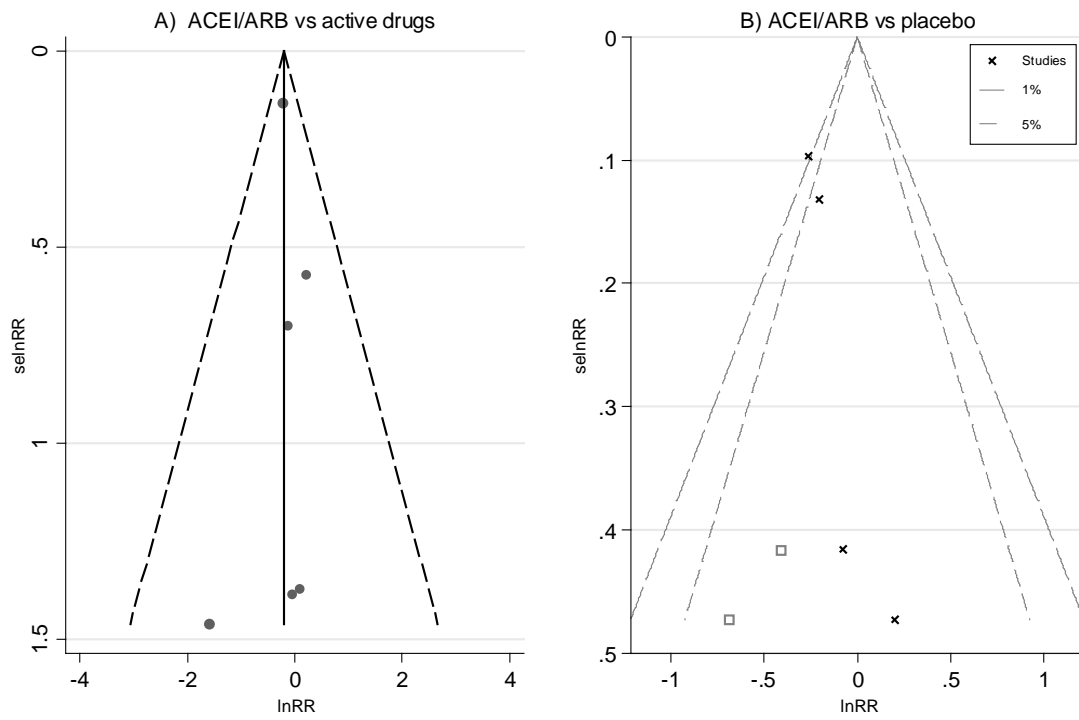

Supplement: 125_2011_2398_MOESM1_ESM.pdf [file 125_2011_2398_MOESM1_ESM.pdf]

ESM Figure 2. Funnel plot for doubling of serum creatinine

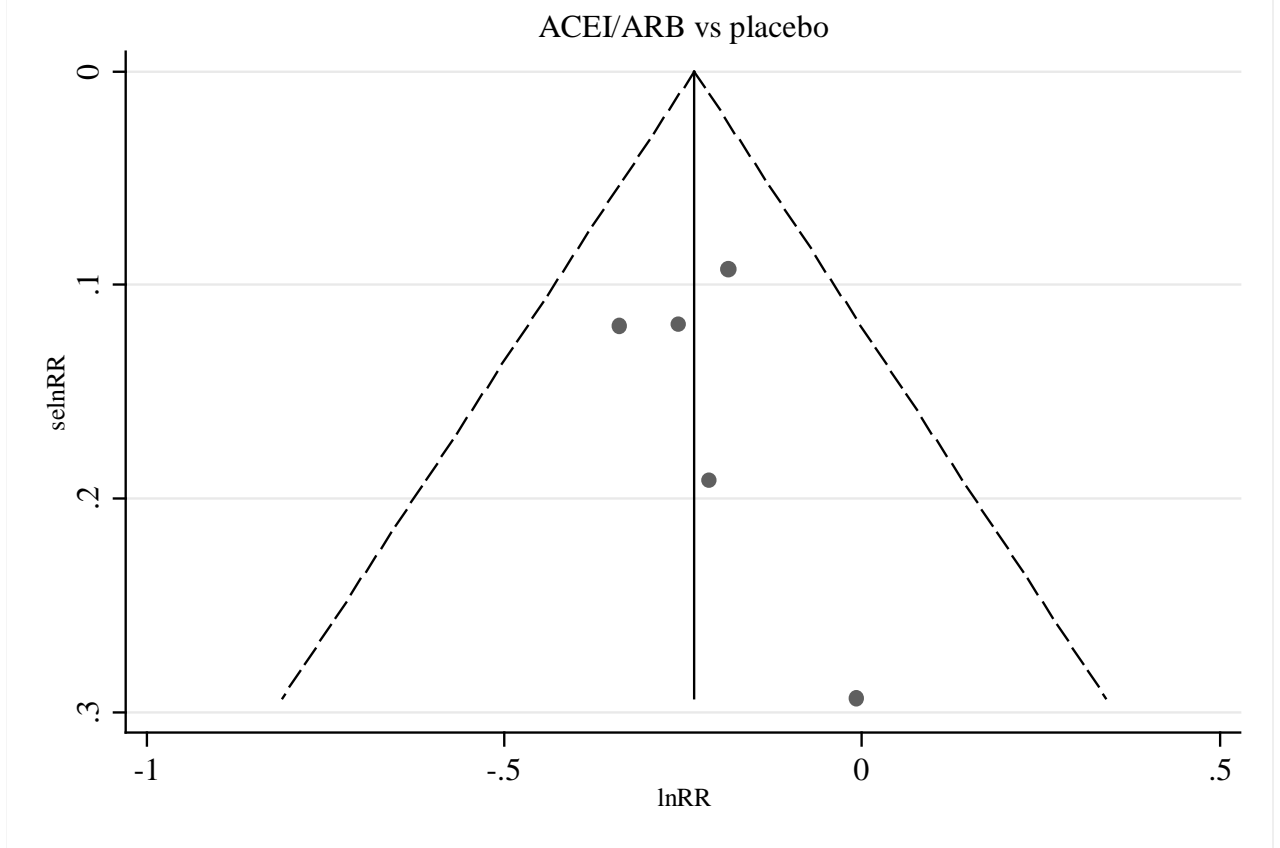

Supplement: 125_2011_2398_MOESM2_ESM.pdf [file 125_2011_2398_MOESM2_ESM.pdf]

ESM Figure 3. Funnel plot for microvascular outcome:  
ACEI/ARB vs placebo

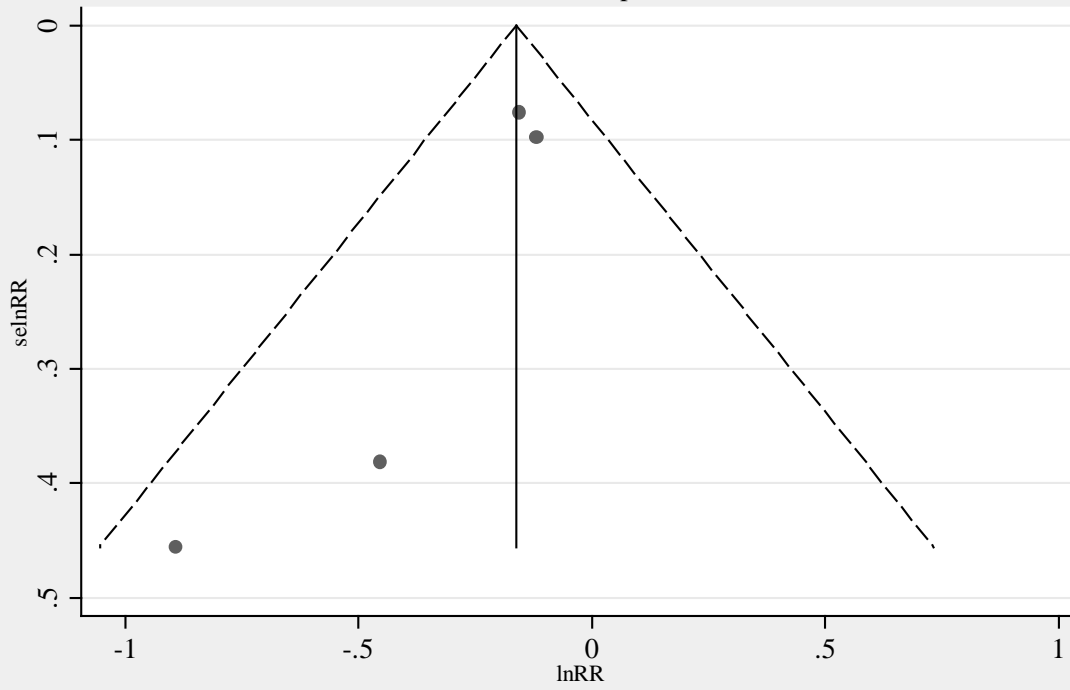

Supplement: 125_2011_2398_MOESM3_ESM.pdf [file 125_2011_2398_MOESM3_ESM.pdf]

ESM Figure 4. Funnel plots for macro-albuminuria

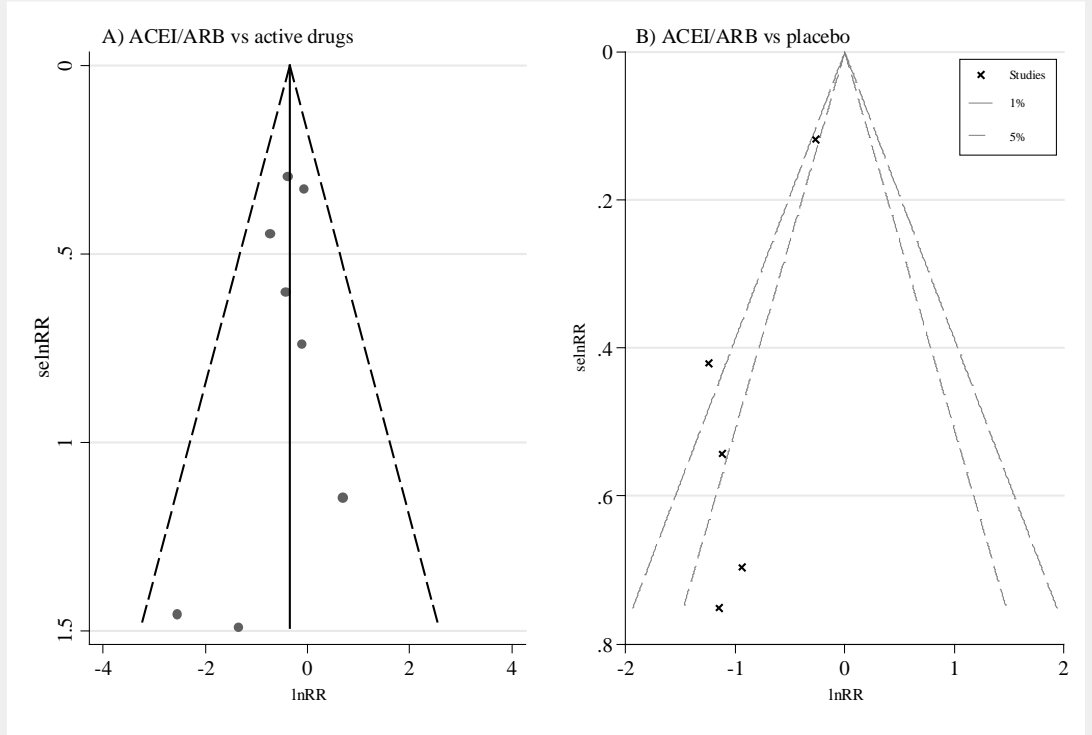

Supplement: 125_2011_2398_MOESM4_ESM.pdf [file 125_2011_2398_MOESM4_ESM.pdf]

ESM Figure 5. Funnel plots for micro-albuminuria

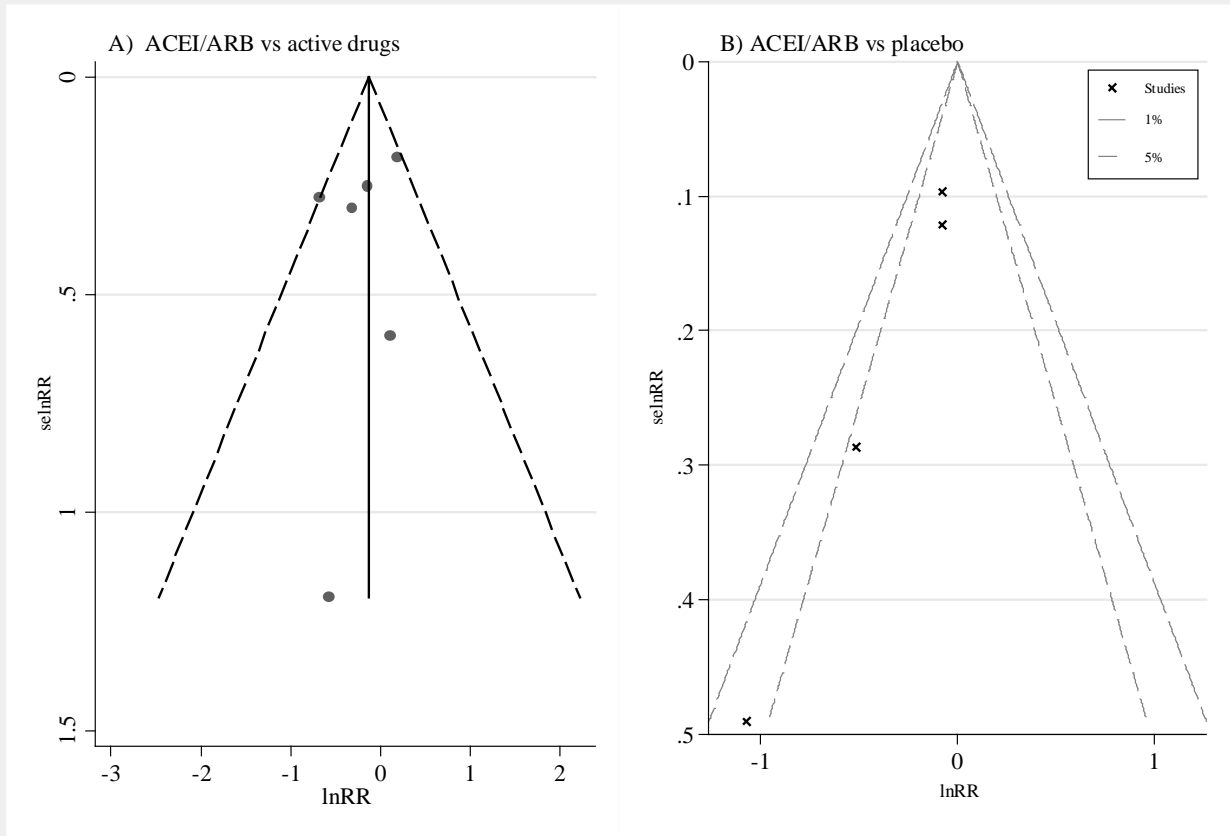

Supplement: 125_2011_2398_MOESM5_ESM.pdf [file 125_2011_2398_MOESM5_ESM.pdf]

ESM Figure 6. Funnel plot for albuminuria regression

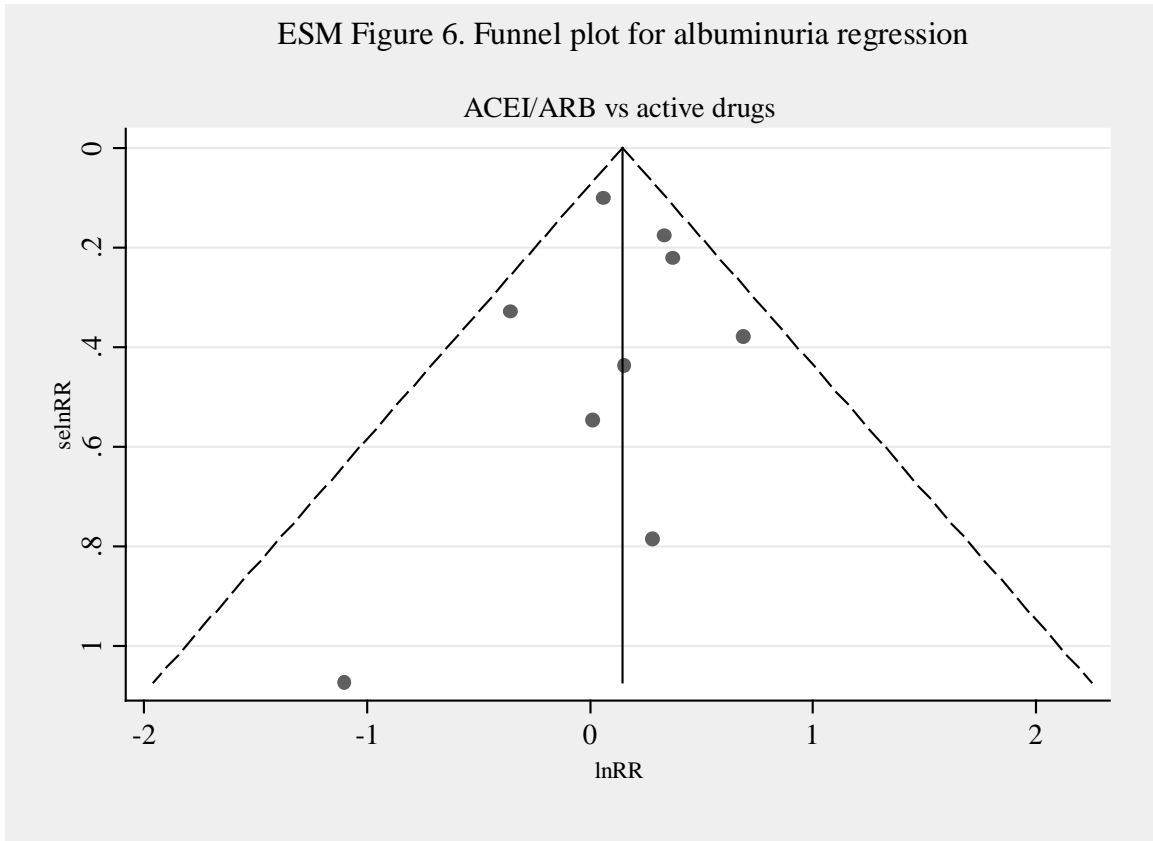

Supplement: 125_2011_2398_MOESM6_ESM.pdf [file 125_2011_2398_MOESM6_ESM.pdf]
